# Supplementary material for: DeepPrecip: A deep neural network for precipitation retrievals
Source: Copernicus journal article supplement (doi:10.5194/egusphere-2022-497), 2022-06-16
Supplement: Supplementary file [file egusphere-2022-497-AC1-supplement.pdf]

## Reviewer Response Document

### Reviewer 1

We thank the reviewer for their detailed examination of the manuscript and especially their focus on improving the clarity of the machine learning components of the article. We have responded to each of their comments below with a description of how we have adjusted the manuscript.

**The main concern I have is with the main result of the paper and the units of the data in Figure 4. To me these accumulation values seem unreasonably small, which makes me concerned there is some sort of error in either a unit conversion or these are truly just really light precipitation events. Let me explain my reasoning. The maximum accumulation reported in Figure 4a (and Figure 6a) shows a 20 min accumulation of 0.1 mm. I am more familiar with English units, so 0.1 mm is 0.004 inches of precipitation. 0.004 inches of precipitation is less than the precision of a common ASOS tipping bucket (1 tip in a tipping bucket gauge is 0.01 inches of precipitation). Thus most of the precipitation events shown in Figure 4 are instances where the amount of precipitation in 20 mins is less than 1 tip of an ASOS rain gauge. I hope you see my concern if these accumulations are correct. If the maximum precipitation amount is less than 1 tip of a tipping bucket gauge how representative is the data the authors present compared to the 'global' distribution of precipitation, especially convective precipitation. While we are discussing Figure 4a, do you have any thoughts of why for JOYCE and Marquette the ML predictions are basically anchored around 0.04 mm? One last comment on Figure 4, (specifically c). I am confused how this plot was made. What is a normalized time step? Could you help readers by explaining a bit more how this plot was made in the text?**

We thank the reviewer for their comment and agree that the presentation of these results and their units were not clearly presented to the reader. The reason values in Fig. 4 typically fell below 0.1 mm is a consequence of the non real time (NRT) accumulation values we use from the Pluvio2 automatic weighing gauge. Unlike the real time (RT) 1-minute intensity measurements from the Pluvio2, the NRT values require a 5 minute delay from the point of observation to provide an accumulation measurement. With this delay, along with improved filtering, finer amounts of precipitation can be captured by the gauge (OTT, 2022). We agree that this information could be communicated more clearly, and we now show the total sum of NRT accumulation over the 20 minute period instead of the average 5 minute NRT values over the 20 minute period. This has the result of increasing the amounts of reported accumulation by a factor of 4, making the results easier to understand and bringing the reported values more closely in line to what is traditionally used in the literature when referring to gauge accumulation quantities. The use of the NRT values has now been explicitly described in the text in Section

4.1, paragraph 1. In terms of Figure 4a, this is an excellent point and we believe this is a consequence of mixed-phase precipitation occurrence at these sites during these periods and an inability of the model to fully capture the resulting precipitation intensity. Both of these periods had temperatures near zero coupled with periods of precipitation extremes and we likely require additional input covariates or more training data for the model to better link the observed atmospheric conditions to a correct intensity. You will note an improved skill in DP over the RF in early JOYCE measurements though, suggesting some improved skill here. We now include an additional description of this feature in the manuscript in Section 4.1, paragraph 1. Regarding your last comment on Fig 4.c, we agree that the "normalized timestep" was not clear, and have now broken this into two plots in a similar manner to Fig 4.a.

**While I am happy the authors made sure they spent the time to explain their hyperparameter search and some details of their training/test splits, there is no explicit comment of which dataset is being shown in the results section. This is vital to any machine learning paper. The authors must state if the results being shown are from the training or the test dataset. This will allow readers to assess if the results are an unbiased assessment of skill or if they seem to be overfit. This gets more challenging since the authors did a k-fold cross validation approach, I am unsure which fold they used to show the results. Please explain.**

The results in this paper are derived from the test set of our 90/10 stratified CV split. We train/test 10 identical DP models based on different non-shuffled splits of the available dataset (always using the test set when referring to model performance). Additionally, each CV split is now run 50 times using dropout to provide additional insight into model uncertainty. To make this clearer to the reader, we have now included an additional paragraph at the end of Section 3.2 where we describe the DeepPrecip testing methodology.

**Upon inspection of the references provided for Table 2, I noticed that some of these are not specifically K-band relationships. For example Kulie and Bennartz (2009) derive relationships for W-, Ka- and Ku- but not K. Similarly, Matrosov (2007) is for Ka and W. Lastly, Marshall and Palmer (1948) is a Rayleigh power law. While it might seem like using a Ka-band relationship for K-band is harmless, issues arise when non-Rayleigh conditions are encountered (e.g., particle sizes are similar to the wavelength), which tend to coincide with large precipitation rates. You should acknowledge that this could be a source of error in your analysis and might be an unfair comparison for your discussion on lines 195 – 209 (Figure 4cd). Lastly, you state in the table caption and the discussion on line 112 that all the relationships are K-band, which is incorrect. To prevent future readers from inaccurately using the reported relationships in your paper on their K-band radars, please correct this mistake.**

We agree that the wording in this section is incorrect and have restructured references to these comparison power laws to reflect the fact that they are derived from similar, but not necessarily exactly the same band as the MRR. We agree that these slight differences in bandwidth are a source of additional uncertainty in our analysis (and now make reference to this with additional

sentences in the final paragraph of Section 5), however based on comparisons from previous studies comparing between similar MRR-derived power laws to KuKa retrievals, we expect errors to be mostly negligible (Kidd et al., 2021, Souverijns et al., 2017; Das & Maitra, 2016; Rakshit & Maitra 2016). We also now explicitly list the derived band for each power law in Table 2.

**The authors mention a random forest model that was based on previous work, but no citation is provided for this model. Given that this random forest model is involved in the primary conclusions of this paper, there is more detail needed. The current description on Lines 146 – 149 is insufficient for reproducibility do not include any of the details of how big the random forest is. Please provide the citation where this model was developed. If there is no citation, please provide more specific details on the random forest model. Also, please note if this model was re-trained on your current data or is it still using the X-band snowfall relationships from GCPEX.**

We thank the reviewer for this comment and have now added a reference to the paper in which the RF model was developed with all training details (<https://journals.ametsoc.org/view/journals/apme/aop/JAMC-D-22-0036.1/JAMC-D-22-0036.1.xml>) as it is now accepted and published in JAMC. This model was retrained using the same datasets/CV structure as DeepPrecip and this information has been clarified in the manuscript in Section 3.2, paragraph 4.

**There was no discussion on if you scaled the features of the ML model. It is common practice to scale data to have mean 0 and variance 1 in machine learning so that the ML model doesn't unintentionally use a variable with a larger absolute value. For example the dynamic range of radar reflectivity is -10 – 40 dBZ. While the range of temperature is 233 – 313, and the range of doppler velocity is -5 – 5 m/s. See how these three all vary on a different order of magnitude? Did you end up scaling your data? Or did you use batchnorm in training? (I did not see this a parameter in Table 5). Please comment on this.**

We can confirm that we do apply a scaling to have a mean of 0 and variance of 1 for all data before training. This has been clarified in the text in paragraph 5 of Section 3.2.

**It would seem there was an issue with LaTeX building the document, all of the parenthetical citations do not correctly put citations into parentheses. This made reading some parts of the paper more difficult. Please be sure to use `\citep[e.g.,][]{Paper}` to correctly get the formatting to work. (or `\citet` for inline citations).**

We thank the reviewer for this comment and have updated all references throughout the manuscript to properly use `\citet` and `\citep` commands.

**Line 16: This is an example of the citation issue noted in the minor comments.**

This has now been fixed.

**Lines 60: Be careful here. In my head liquid water content is usually the water content per cubic meter (e.g., g/m<sup>3</sup>). Might be good to use a different word here, “records precipitation accumulation” something like that.**

We agree and this has now been changed as suggested by the reviewer.

**Line 84: could you spell out what TMP and WVL are? This is the first time they are defined**

TMP is atmospheric temperature and WVL is vertical wind velocity. The definitions for these variables have now been moved to their first use/definition on this line.

**Figure 2: I assume darker colors mean higher density? You might want to either include a colorbar somewhere or write it in the caption. Could you note in the caption that the wind velocity is vertical wind velocity and which direction negative is? (is negative wind velocities up or down?). This confused me at first because I thought it might be the horizontal wind velocity, but then I didn't know how to interpret negative values. Why is the unit in m/s on Figure 2 for wind velocity, but in Pa/s in Table 3?**

Yes, the reviewer's assumption is correct, the darker colors indicate higher density of observations (we now mention this in the Figure 2 caption). We have also included a more detailed description of wind velocity (i.e. the speed of air motion upwards/downwards using a pressure-based vertical coordinate system) in Section 2.4 of the manuscript. Therefore negative values indicate upwards air motion (since pressure decreases with height). The units have now been updated on Fig. 2 to properly reflect the Pa/s units described in Table 3.

**Lines 93 – 94: How much data was not used because of the 5 m/s wind threshold. It is my experience that some of the strongest precipitation events occur coincidentally with strong winds. You might want to comment how this effects the total scope of precipitation events you are training your model on.**

While it varies based on the location, we find that approximately 16% of our available sample is dropped when we apply the 5 m/s wind threshold. We agree that this can lead to a loss of some high intensity precipitation events at certain sites, but examining pre- and post-dropped wind threshold data shows that the maximum intensity precipitation events are not removed after applying this wind thresholding technique. We now make reference to this in Section 2.5, paragraph 1.

**Lines 95 – 102: If you were to extend this work in the future, it might be good to use wet-bulb temperature as a way to split when it is raining vs snowing (Sims and Liu 2015).**

We agree that this would be a good addition in future work and have included this reference in Section 2.5, paragraph 2. In terms of rain snow partitioning, after performing a more extensive model validation using 50 dropout runs per CV split, we re-examined our temperature thresholding and found that the 5 degree C threshold actually provided slightly better overall performance and gave us a larger snowfall sample to work with for comparison purposes later on (note that the main results do not change much). The manuscript has been updated to reflect this change.

**Line 152: 90/10 split is sufficient usually, but could you comment on how using a non-shuffled dataset could have seasonality issues? What I mean by that is that often times field campaigns are centered on the event they wish to capture. Thus the bookend times (near the beginning of a campaign and near the end of the campaign), precipitation might be reduced (coming into or out of a 'dry' season). This could be a problem if all of your test splits have weak precipitation events.**

As a consequence of the extended observational periods from multiple sites (e.g. JOYCE, Ny-Alesund and Marquette all have data over multiple seasons/years), combined with the manner in which we perform the 10-fold CV (training and testing our model on different contiguous sections of the full dataset) stratified by each site, we found that we end up gathering a representative enough sample for the CNN to perform in a robust manner. While the reviewer is correct that an individual split could potentially focus solely on low intensity events as a result of sampling (and therefore perform poorly on high intensity events), when we examine the performance of the model for each of the individual non-shuffled splits in this case, we find similar overall performance for DeepPrecip (suggesting this is not an influential effect).

**Line 276: What p-value and statistical test was used to make the significant conclusion? Please refrain from using the word significant unless you used a statistical test to determine significance.**

We are referring to the Shapley values to describe the importance of input covariates throughout this section and have now updated the language to avoid confusion with statistical significance.

**Lines 306-307: What do you mean by 'assimilate non-attenuated near surface radar data' in the context of spaceborne radars? As you noted before the blind-zone is an issue because of clutter, not attenuation. I am a bit confused by this statement.**

We thank the reviewer for catching this, we are indeed referring to ground clutter here and have now updated the language on this line to reflect that.

**Lines 315-316: Just because an echo is > 3 km does not mean it is convective. There are plenty of GPM and CloudSat profiles that have stratiform echoes reaching all the way up to the tropopause (~10 km in the mid-latitudes). Also, the planetary boundary layer in most locations is likely not extending up to 3km. I would guess maybe 1-2 km on average. But I am not an expert in boundary layers. Be careful in the statements here.**

We agree and have updated this line to simply refer to possible underestimation biases from missing precipitation above the 3 km range of the MRR.

Again, we thank the reviewer for their constructive criticism and for motivating us to further improve the quality and accuracy of the article.

**References:**

Das, S., & Maitra, A. (2016). Vertical profile of rain: Ka band radar observations at tropical locations. *Journal of Hydrology*, 534, 31–41. <https://doi.org/10.1016/j.jhydrol.2015.12.053>

Kidd, C., Graham, E., Smyth, T., & Gill, M. (2021). Assessing the Impact of Light/Shallow Precipitation Retrievals from Satellite-Based Observations Using Surface Radar and Micro Rain Radar Observations. *Remote Sensing*, 13(9), 1708. <https://doi.org/10.3390/rs13091708>

Rakshit, G., & Maitra, A. (2016). Simultaneous Radar Observations of Vertical Profile of Rain Features from Space and Ground at Ku and Ka Bands at a Tropical Location. *MAPAN*, 31(4), 291–297. <https://doi.org/10.1007/s12647-016-0183-3>

Souvereinjs, N., Gossart, A., Lhermitte, S., Gorodetskaya, I. V., Kneifel, S., Maahn, M., Bliven, F. L., & van Lipzig, N. P. M. (2017). Estimating radar reflectivity—Snowfall rate relationships and their uncertainties over Antarctica by combining disdrometer and radar observations. *Atmospheric Research*, 196, 211–223. <https://doi.org/10.1016/j.atmosres.2017.06.001> "

King, F., Duffy, G., & Fletcher, C. G. (2022). A Centimeter Wavelength Snowfall Retrieval Algorithm Using Machine Learning. *Journal of Applied Meteorology and Climatology*, 1(aop). <https://doi.org/10.1175/JAMC-D-22-0036.1>

OTT Hydromet, 2022. Operating Instructions OTT Pluvio2 precipitation gauge, Document number 70.020.000.B.E 04-0515
